# Supplementary material for: New Players in Neuronal Iron Homeostasis: Insights from CRISPRi Studies
Source: MDPI journal article supplement (doi:10.3390/antiox11091807), 2022-09-14
Supplement: s1 [file s1]

**Supplementary Table S1.** High confidence iron responsive element (IRE) prediction

| Approved symbol | HGNC ID    | Sequence                         | Position in seq. | CDS         | Relative position to CDS | Hit Class |
|-----------------|------------|----------------------------------|------------------|-------------|--------------------------|-----------|
| ADSL            | HGNC:291   | TCTCAGCCTCCCAAAGTTCTGGGATTATAGA  | 2377 - 2408      | 60 - 1514   | 3' UTR                   | Negative  |
| ALG9            | HGNC:15672 | CAACACACCTGCTCAGAGTAGCAGTTCTCCC  | 4712-4743        | 100 - 1,935 | 3' UTR                   | Positive  |
| CEP295          | HGNC:29366 | AGCCTTACAGATCCAGAGTCATTTTCAGAGC  | 6051 - 6082      | 120 - 7925  | Inside CDS               | Negative  |
| CYB5RL          | HGNC:32220 | CCCAGTGCTGCGGCAGTGGCTGCTCACCCCTG | 354-385          | 278 - 1225  | Inside CDS               | Positive  |
| FOXK1           | HGNC:23480 | CACCAGTCGGGCGGAGTGTGGCCTCATGGTT  | 5964-5995        | 15 - 2216   | 3' UTR                   | Positive  |
| GPAT4           | HGNC:20880 | CCTTGGCCTCCCAAAGTTCTGGGATTACAGG  | 5382-5413        | 928 - 2298  | 3' UTR                   | Positive  |
| KLF7            | HGNC:6350  | TCCATCACCTCTGCAGTGGCAGAGATGGTTA  | 4395 - 4426      | 381 - 1289  | 3' UTR                   | Negative  |
| MFHAS1          | HGNC:16982 | ATCGGGTCGGGGCGAGAGTGCCCCACGCGGT  | 2134-2165        | 198 - 3644  | Inside CDS               | Positive  |
| MRGBP           | HGNC:15866 | TTGATACCAAAGTAAGTTCACCTTTCCTCCA  | 1634-1665        | 52 - 666    | 3' UTR                   | Positive  |
| MYO1C           | HGNC:7597  | CAATCGGCCCTGGGAGCCACCAGGTGGGAAA  | 4599-4630        | 200 - 3391  | 3' UTR                   | Positive  |
| RFX7            | HGNC:25777 | TCTTTCTCTTGGACAGTGATTCAAAGTCAGT  | 2728-2759        | 573 - 3731  | Inside CDS               | Positive  |
| VHL             | HGNC:12687 | AGTGTCTCATTCCTCAGAGTAAAATAGGCACC | 809 - 840        | 71 - 712    | 3' UTR                   | Negative  |
